# Supplementary material
Source: HighWire-hosted journal article supplement (http://sti.bmjjournals.com/highwire/filestream/156170/field_highwire_adjunct_files/3/83suppl1i50webonlyfig3.pdf)
Supplement: 83suppl1i50webonlyfig3.pdf [file 83suppl1i50webonlyfig3.pdf]

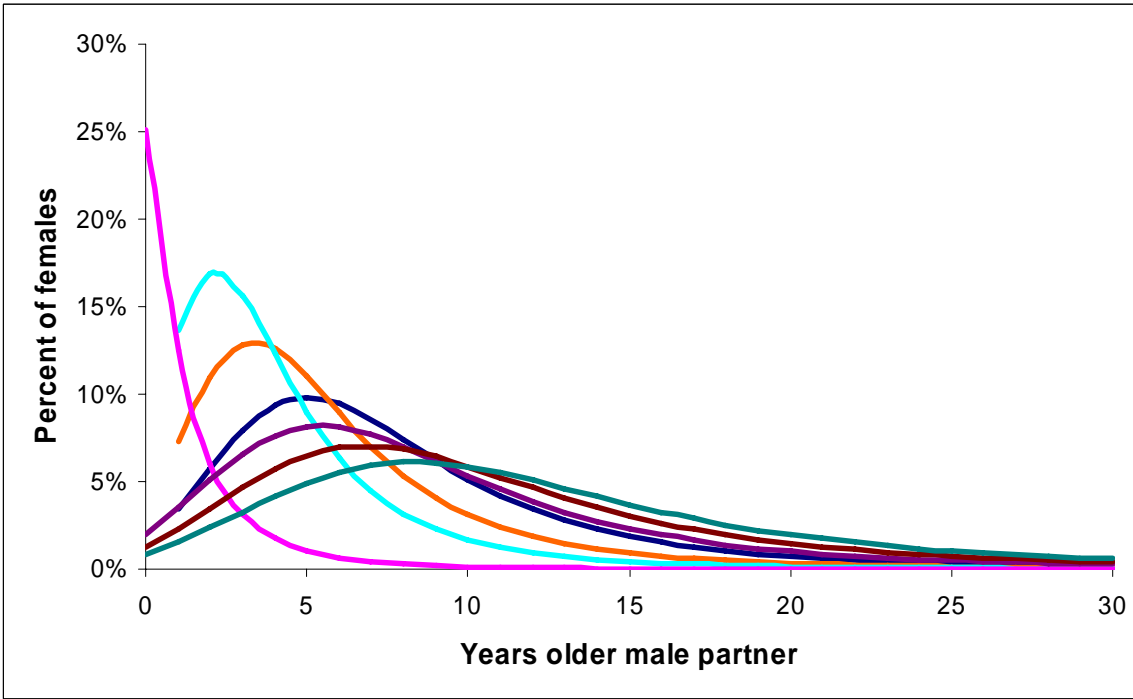

**Figure S3: Age-difference distributions with different levels of cross-generational sex; 1% (pink), 5%, (light blue) 10% (orange), 20% (dark blue), 30% (purple), 40% (dark red), 50% (green). These are the distributions used to create Figure 1(b).**
